# Supplementary material
Source: PubMed Central journal article supplement (PMC3980423)
Supplement: mmc1.pdf [file mmc1.pdf]

The American Journal of Human Genetics, Volume 94

Supplemental Data

**Whole-Exome Sequencing Identifies *KIZ*  
as a Ciliary Gene Associated with  
Autosomal-Recessive Rod-Cone Dystrophy**

Said El Shamieh, Marion Neuillé, Angélique Terray, Elise Orhan, Christel Condroyer,  
Vanessa Démontant, Christelle Michiels, Aline Antonio, Fiona Boyard, Marie-Elise  
Lancelot, Mélanie Letexier, Jean-Paul Saraiva, Thierry Léveillard, Saddek Mohand-Saïd,  
Olivier Goureau, José-Alain Sahel, Christina Zeitz, and Isabelle Audo

| SNP         | Exon | Nucleotide Exchange | Allele State                                      | Protein Effect | Minor Allele Frequency (n=340 subjects) | Alleles Frequency                                                                                                   |
|-------------|------|---------------------|---------------------------------------------------|----------------|-----------------------------------------|---------------------------------------------------------------------------------------------------------------------|
| rs150243168 | 1    | c.48C>T             | heterozygous                                      | p.(=)          | T= 0.006                                | dbSNP: C: 99.862% (2175 / 2178); T: 0.138% (3 / 2179), <b>EVS</b> (EA) T=15/C=7753 (AA) T=2/C=3528                  |
| rs16982513  | 4    | c.348A>G            | 5<br>heterozygous<br><br>/1<br><br>homozygous     | p.(=)          | G= 0.001                                | dbSNP: A: 98.320% (2282 / 2321); G: 1.680% (39 / 2321), <b>EVS</b> (EA) G=6/A=7834 (AA) G=170/A=3356                |
| rs4815025   | 5    | c.417C>G            | 148<br>heterozygous<br><br>/136<br><br>homozygous | p.His139Gln    | C=0.38                                  | dbSNP: C: 45.454% (1668.785 / 3671); G: 54.546% (2002.625 / 3671), <b>EVS</b> (EA) G=5594/C=2636 (AA) G=1445/C=2365 |
| rs200388739 | 5    | c.505A>G            | heterozygous                                      | p.Ser169Gly    | G= 0.001                                | No frequency in dbSNP or 1000Genome, found in Exome chip, NHLBI-ESP , <b>EVS</b> (EA) G=1/A=8237                    |
| rs75984134  | 5    | c.509T>G            | 3<br>heterozygous                                 | p.Met170Arg    | G= 0.004                                | dbSNP: G: 1.437% (33 / 2296); T: 98.563% (2263 / 2296), <b>EVS</b> (AA)= G=107/T=3733                               |
| rs34305929  | 5    | c.698G>A            | heterozygous                                      | p.Gly233Asp    | A= 0.001                                | dbSNP: C: 99.822% (2250 / 2254); T: 0.178% (4 / 2254), <b>EVS</b> (AA) A=50/G=3886                                  |
| rs2236178   | 5    | c.707T>C            | 148                                               | p.Met236Thr    | T=0.34                                  | dbSNP: C: 64.369% (3526.800 / 5479); N: 0.018% (1 / 5464); T: 35.612% (1951.200 / 5479), <b>EVS</b> (EA)            |

|             |       |             |                                            |             |          |                                                                                                                |
|-------------|-------|-------------|--------------------------------------------|-------------|----------|----------------------------------------------------------------------------------------------------------------|
|             |       |             | heterozygous<br><br>/153<br><br>homozygous |             |          | C=5702/T=2592 (AA) C=2660/T=1280                                                                               |
| Not known   | 5     | c.709C>A    | heterozygous                               | p.Pro237Thr | A= 0.001 | not known SNP                                                                                                  |
| rs35460260  | 5     | c.929A>T    | heterozygous                               | p.Glu310Val | T= 0.001 | dbSNP: A: 0.444% (10 / 2254); T: 99.556% (2244 / 2254) ,<br><b>EVS</b> (AA) G=51/C=3695                        |
| rs151319642 | 5     | c.1024C>G   | heterozygous                               | p.Pro342Ala | G= 0.006 | dbSNP: C: 99.770% (2173 / 2178); G: 0.230% (5 / 2178),<br><b>EVS</b> (AA) G=51/C=3695                          |
| Not known   | 6     | c.1061A>G   | heterozygous                               | p.E354G     | G= 0.001 | not known SNP                                                                                                  |
| rs80251208  | 6     | c.1331C>G   | heterozygous                               | p.Ser444Cys | G= 0.001 | No frequency in dbSNP or 1000Genome, found in Exome<br>chip, Illumina, NHLBI-ESP , <b>EVS</b> (AA) G=26/C=3648 |
| Not known   | 7     | c.1383G>A   | heterozygous                               | p.(=)       | A= 0.001 | not known SNP                                                                                                  |
| rs36064635  | 8     | c.1488C>T   | heterozygous                               | p.(=)       | T= 0.001 | dbSNP: A: 0.444% (10 / 2254); G: 99.556% (2244 / 2254),<br><b>EVS</b> (EA) T=1/C=8209 (AA) T=83/C=3679         |
| rs201638838 | 10    | c.1745G>A   | heterozygous                               | p.Arg582Lys | A= 0.003 | No frequency in dbSNP or 1000Genome, found in Exome<br>chip, NHLBI-ESP , <b>EVS</b> (AA) A=5/G=3805            |
| rs34011504  | 11    | c.1809C>T   | heterozygous                               | p.(=)       | T= 0.003 | dbSNP: A: 0.975% (22 / 2256); G: 99.025% (2234 / 2256),<br><b>EVS</b> (EA) T=1/C=8305 (AA) T=104/C=3792        |
| rs34269420  | 11    | c.1870C>T   | heterozygous                               | p.Pro624Ser | T= 0.006 | dbSNP: A: 0.886% (20 / 2256); G: 99.114% (2236 /<br>2256), <b>EVS</b> (AA) T=106/C=3656                        |
| rs115272132 | IVS12 | c.1924+3G>A | heterozygous                               | .....       | A= 0.004 | dbSNP: A: 0.523% (12 / 2296); G: 99.477% (2284 / 2296),<br><b>EVS</b> (EA) A=1/G=8155 (AA) A=80/G=3544         |

Table S1: Benign *KIZ* variants identified in autosomal recessive RCD subjects: Ref.: NM\_018474.4
